# Supplementary material
Source: PubMed Central journal article supplement (PMC2644133)
Supplement: 0812945106_0812945106SI.pdf [file 0812945106_0812945106SI.pdf]

# Supporting Information

Zhao *et al.* 10.1073/pnas.0812945106

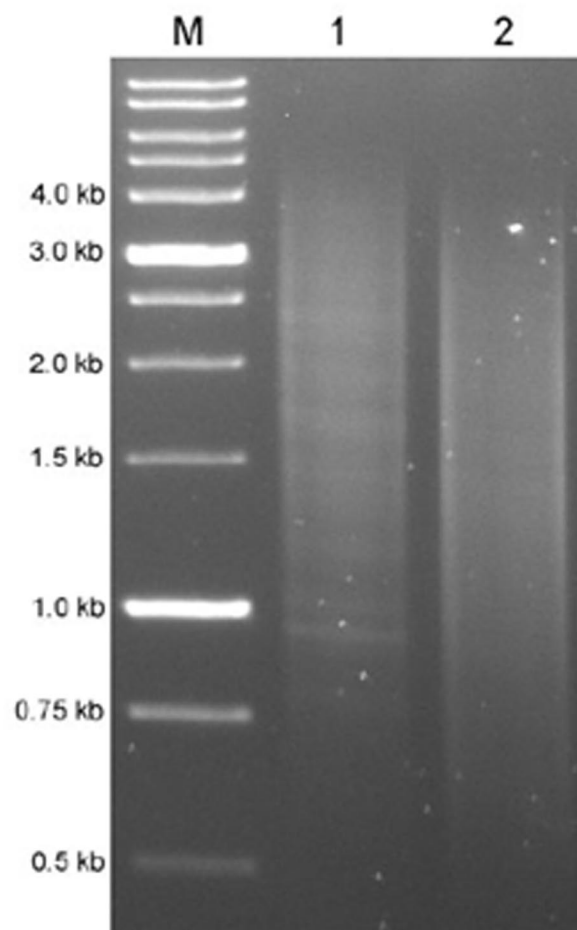

**Fig. S1.** Agarose gel picture of cDNA preparation used in 454 sequencing. Agarose gel electrophoresis of amplified cDNA before (1) and after (2) normalization. M stands for 1 kb DNA marker.

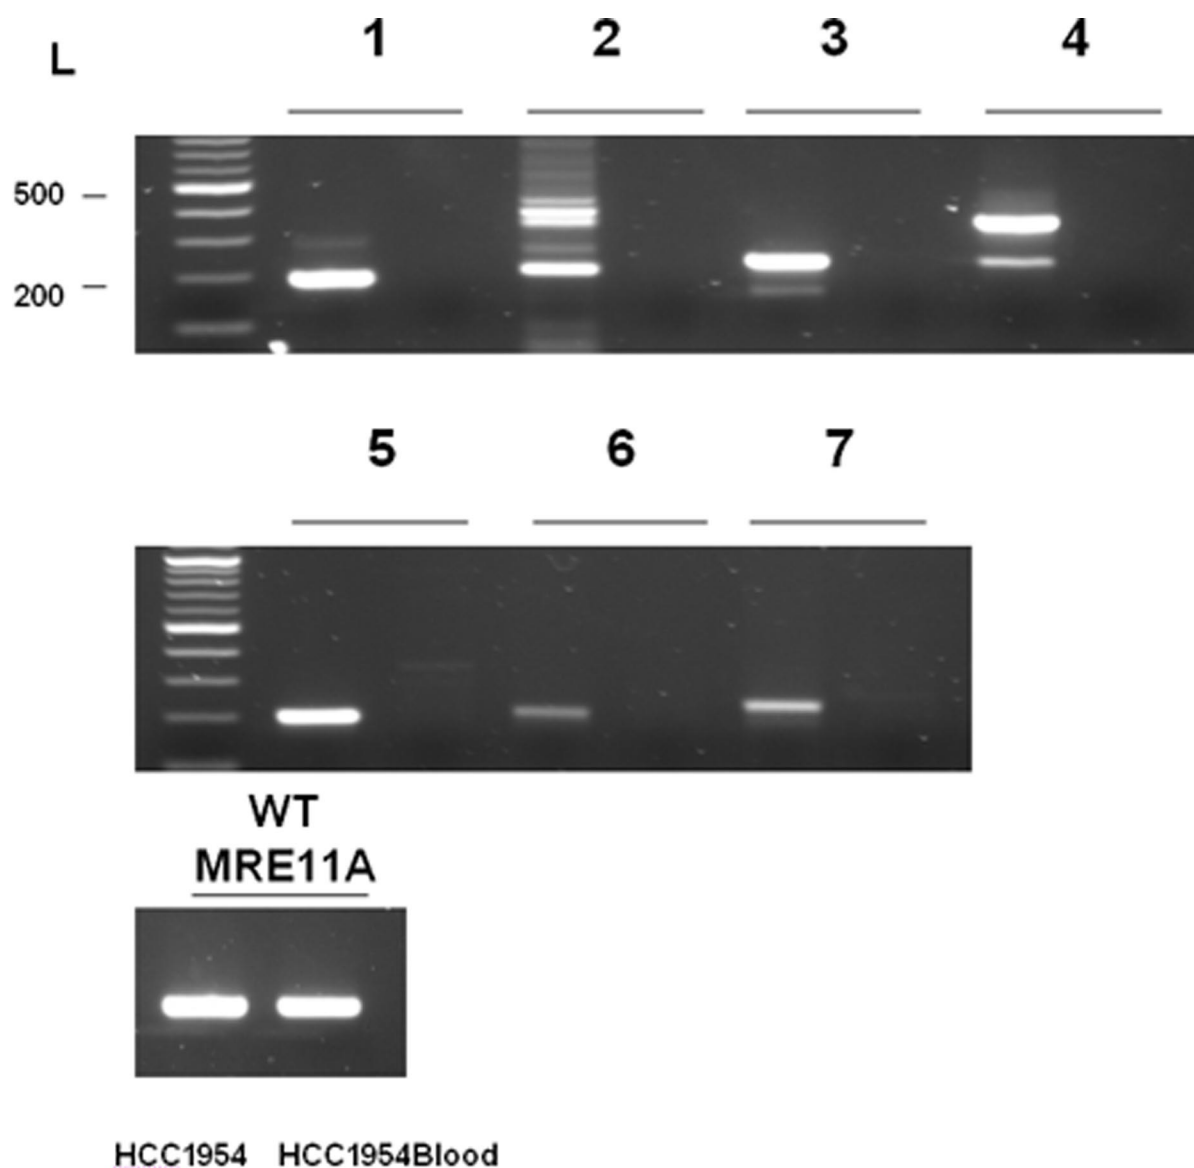

**Fig. S2.** Chimeric cDNA validation. The order of the chimeras is as the same as in Table 1, also as listed below. For each chimera, the left lane1 is HCC1954, right lane is HCC1954 blood. L stands for ladder in base pairs. Positive control used MRE11A wild-type cDNA fragment. 1, t(5;8)(q35.3;q24.21). 2, t(5;8)(p15.33;q24.21); 3, t(5;8)(q23.1;q23.1); 4, t(4;11)(q32;q21); 5, t(9;18)(p24.1;q12.2); 6, t(8;2)(q24.12;q22.1); 7, intronic inversion between 8q24.12 and 8q24.22.

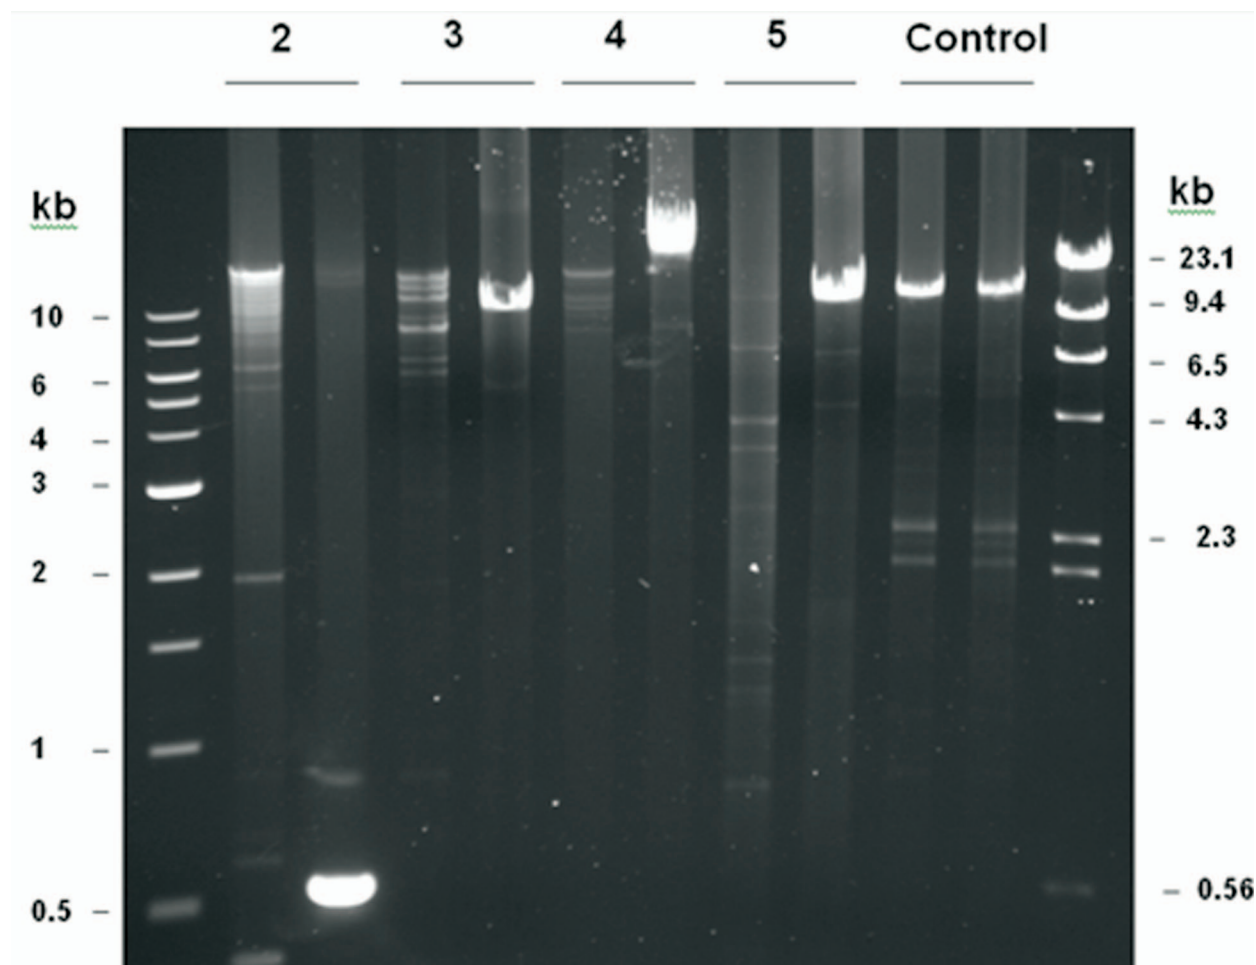

**Fig. S3.** Chromosome rearrangements confirmed at the genomic level by long-range PCR (LR-PCR). The order of the chimeras is as the same as used in Table 1. For each chimera, the left lane is HCC1954 blood, the right lane is HCC1954. Control genomic LR-PCRs amplified in both HCC1954 and HCC1954 Blood.

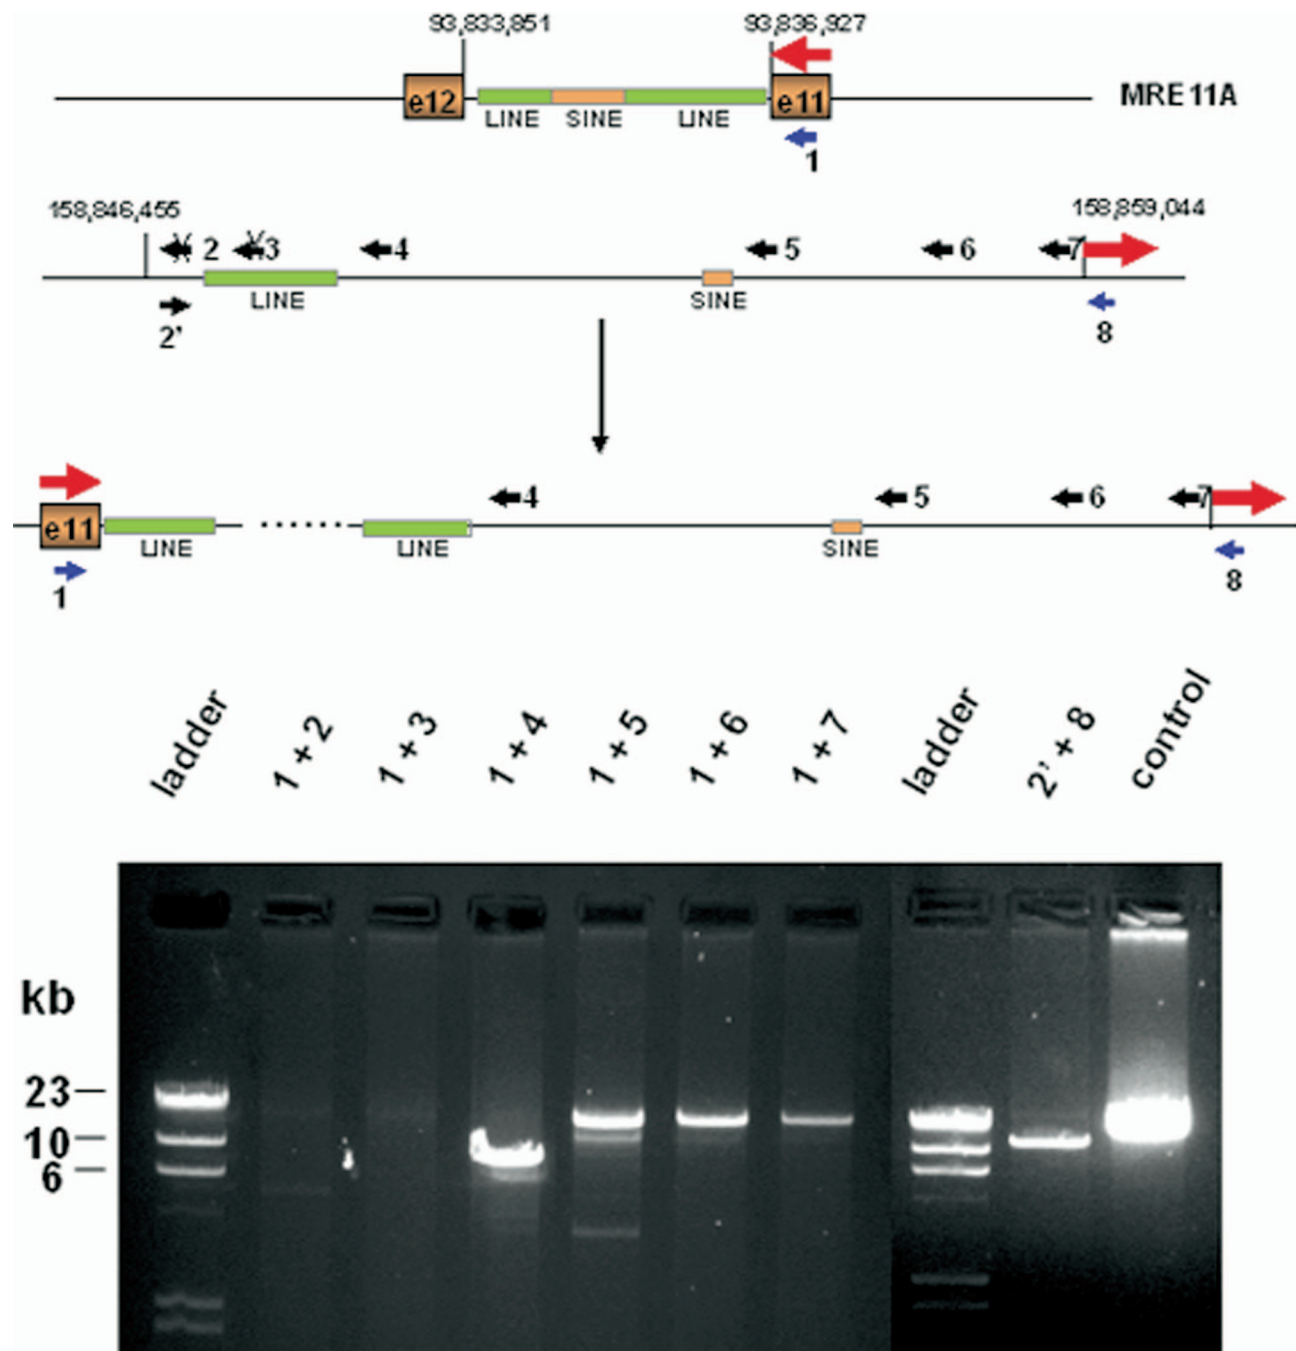

**Fig. S4.** Genomic PCR-walking to amplify the t(4;11)(q32;q21) break junction. Forward primer: 1, TCT TCG CTT TAG CCA GAA AT (in MRE11A exon11); 2', GAA GTA GAA CCA TTA CAT TTG TC (in intergenic region of chr4). Reverse primers (in intergenic region of chr4): 2, GAC AAA TGT AAT GGT TCT ACT TC; 3, CAA GGT AAT TTA CAG ATT CAA TG; 4, AGT GAC AAG AAA GAT TTC CAG ATG; 5, AGG AAA GAG CTT GTG AGT GG; 6, TTC CAT TGC ATT TCT GAC AAC TGC; 7, TCT TGC ACA TTC CCA GAG ACT; 8, TCT TGC ACA TTC CCA GAG ACT. Control lane is from Takara kit, a 17,000-bp fragment. Interchromosomal break of t(4;11)(q32;q31) was speculated to occur in intron 11 of MRE11A and an intergenic region on chromosome 4. A forward primer in MRE11A exon11 was paired up with series of reverse primers in the intergenic region on chromosome 4 to amplify genomic break junction fragments by long-range PCR. We were able to amplify a series of genomic DNA fragments from the break junction specifically in HCC1954. The shortest fragment amplified in LR-PCR, which was  $\approx 9$  to 10 kb by primer pair (1+4), was subsequently shotgun sequenced with the 454 GS FLX technology. The fine assembly and mapping of this 9-kb fragment was resolved as described in Fig. 4.

\* Chimeric events identified by additional screening algorithm (see paper text).

**Table S2. Coverage of 454 reads at the break junctions of chimeric and wild-type transcripts**

| Genes involved in the chimeras | No. 454 reads traverse the wild-type junction for the first gene involved | No. 454 reads traverse the wild-type junction for the second gene involved | No. 454 reads traverse the chimeric junction |
|--------------------------------|---------------------------------------------------------------------------|----------------------------------------------------------------------------|----------------------------------------------|
| NSD1                           | 5                                                                         | N/A                                                                        | 10                                           |
| PVT1 and CLPTM1L               | 4                                                                         | 1                                                                          | 2                                            |
| EIF3E                          | 14                                                                        | N/A                                                                        | 27                                           |
| MRE11A                         | 6                                                                         | N/A                                                                        | 4                                            |
| PDCD1LG2 and C18orf10          | 0                                                                         | 4                                                                          | 1                                            |
| SLC20A2 and DBX2               | 1                                                                         | 0                                                                          | 3                                            |
| SAMD12                         | 21                                                                        | N/A                                                                        | 6                                            |
| PHF20L1 and SAMD12             | 11                                                                        | N/A                                                                        | 10                                           |
